# Supplementary material for: Microbial-Transferred Metabolites and Improvement of Biological Activities of Green Tea Catechins by Human Gut Microbiota
Source: MDPI journal article supplement (doi:10.3390/foods13050792), 2024-03-04
Supplement: s1 [file s1]

**Figure S1.** Chemical structures of EGCG, EGC, ECG, and EC. The compounds in red are shared same structures among EGCG, EGC, ECG, and EC.

**Figure S2.** The workflow for the metabolic study.

**Figure S3.** Total ion chromatograms (TIC) of control 1 using human fecal suspension (HFS) and medium (A), control 2 using GTCs incubated for 0h by HFS(B), and GTCs samples mixed at different time points (2, 4, 8, 12, 24 and 48h) after fermentation by HFS(C).

**Figure S4.** The MS2 spectrum and the cleavage pathways of EC.

**Figure S5.** The MS2 spectrum and the cleavage pathways of M6.

**Figure S6.** The MS2 spectrum and the cleavage pathways of M7.

**Figure S7.** The MS2 spectrum and the cleavage pathways of M8.

**Figure S8.** The MS2 spectrum and the cleavage pathways of M9.

**Figure S9.** The MS2 spectrum and the cleavage pathways of M16.

**Figure S10.** Heat map of dynamic changes in the peak areas of microbial GTCs metabolites at different fermentation times of 0, 2, 4, 8, 12, 24, and 48 h. Red and blue boxes represent values that are higher and lower than the mean value, respectively.

**Table S1.** The peak areas of metabolites detected in fermentation broth at different fermentation times at 0, 2, 4, 8, 12, 24, and 48 h, respectively.

**Table S2** The maximal concentrations of metabolites detected fermentation broth at different fermentation times at 0, 2, 4, 8, 12, 24, 48 h, respectively.

**Table S3.** Basic information of volunteers.

**Figure S1.**

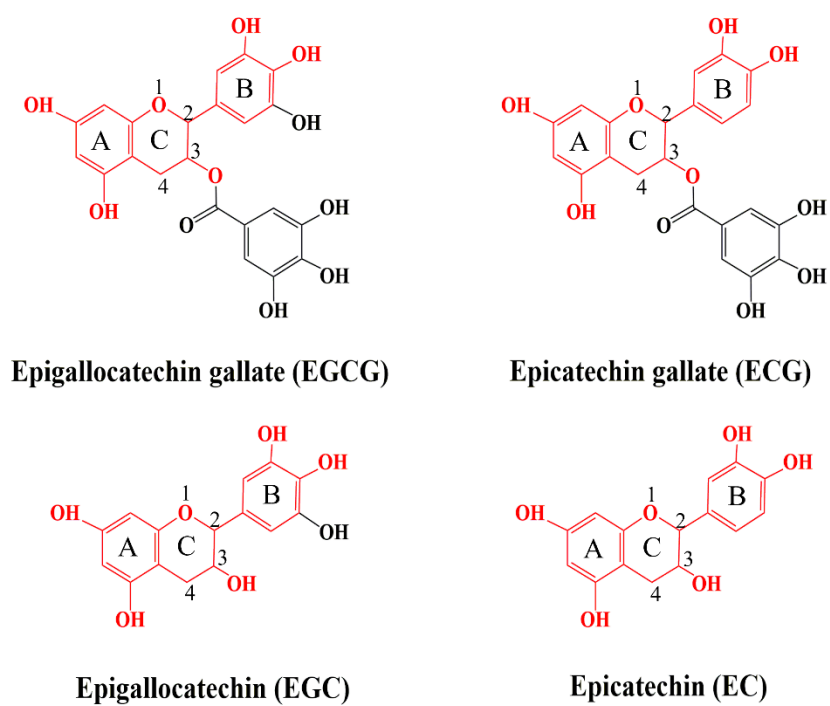

**Figure S2.**

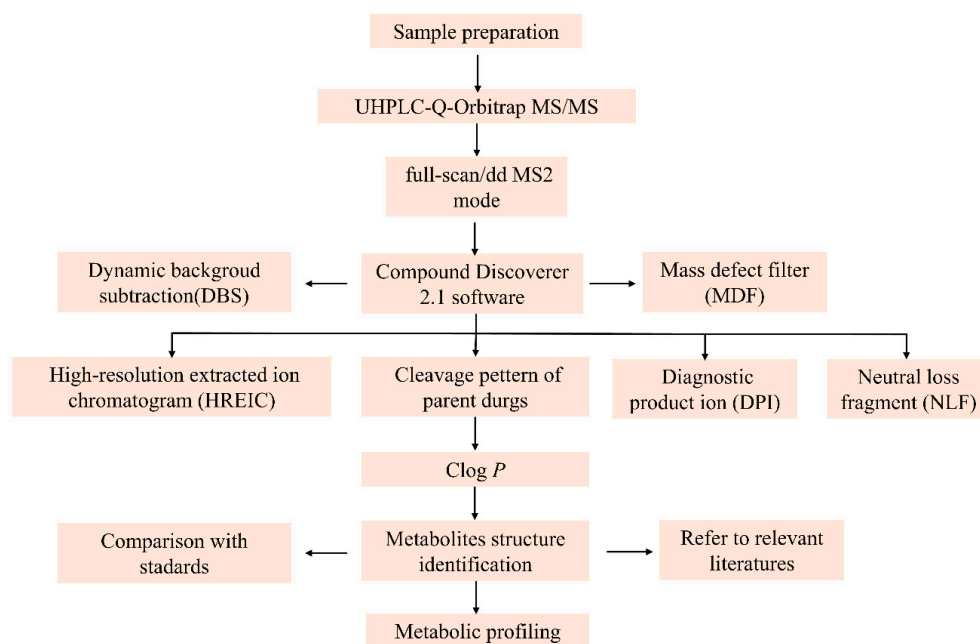

Figure S3.

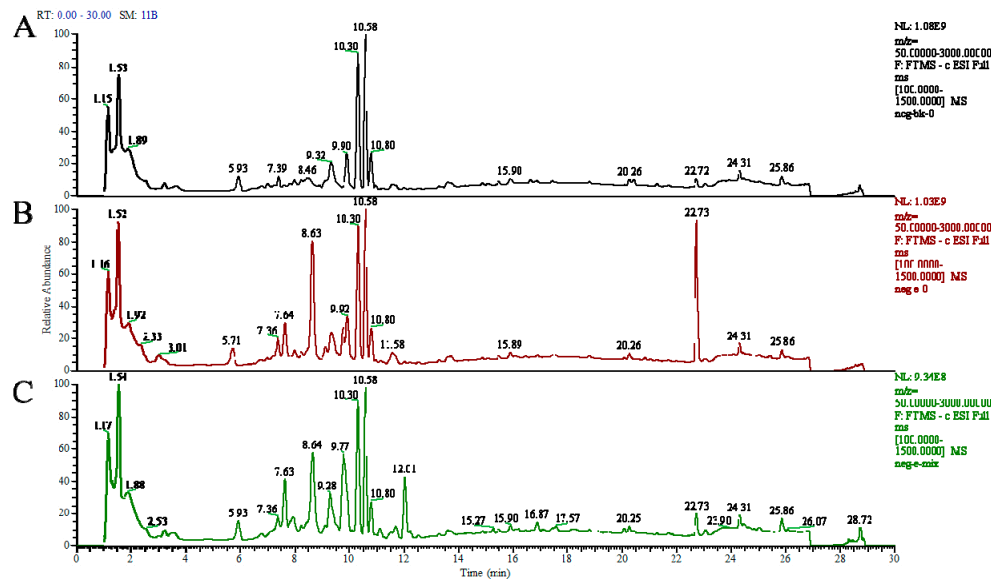

Figure S4.

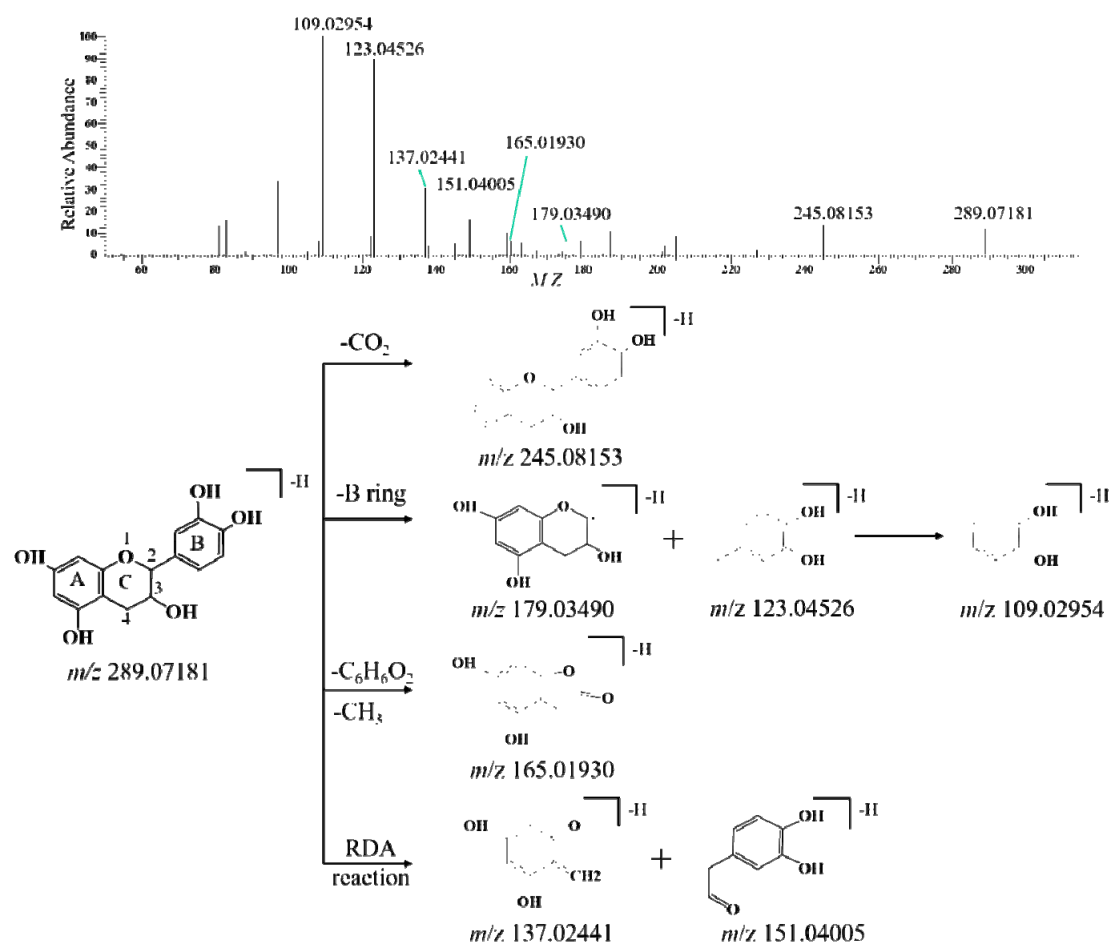

**Figure S5.**

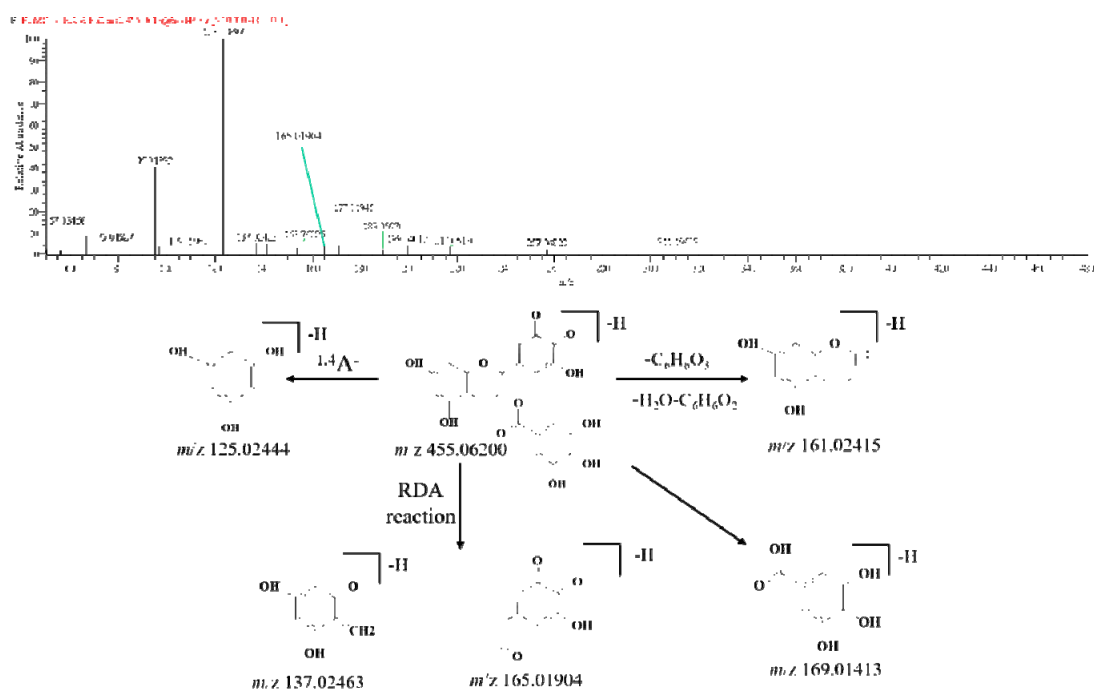

**Figure S6.**

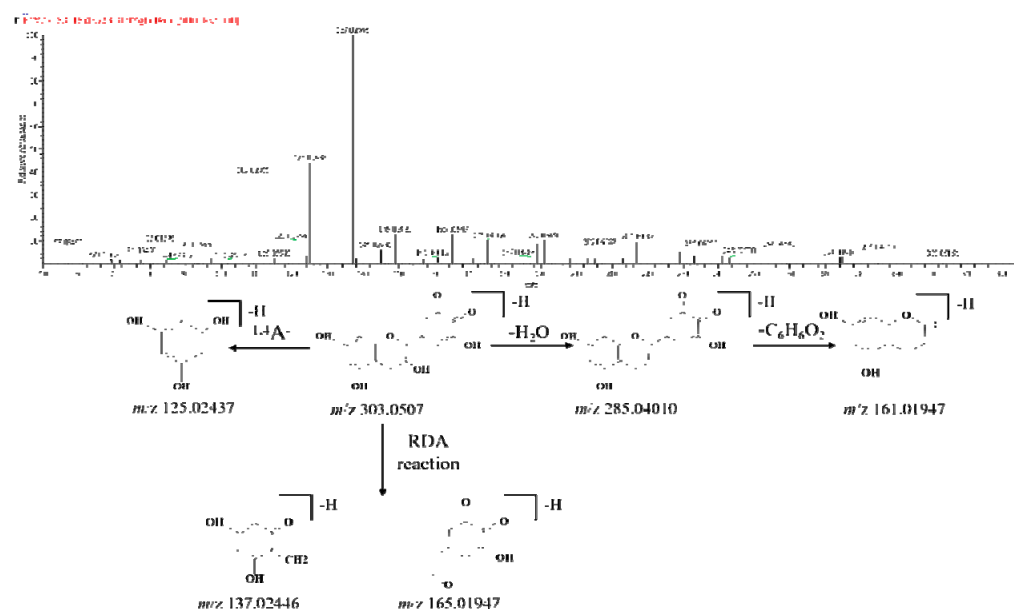

Figure S7.

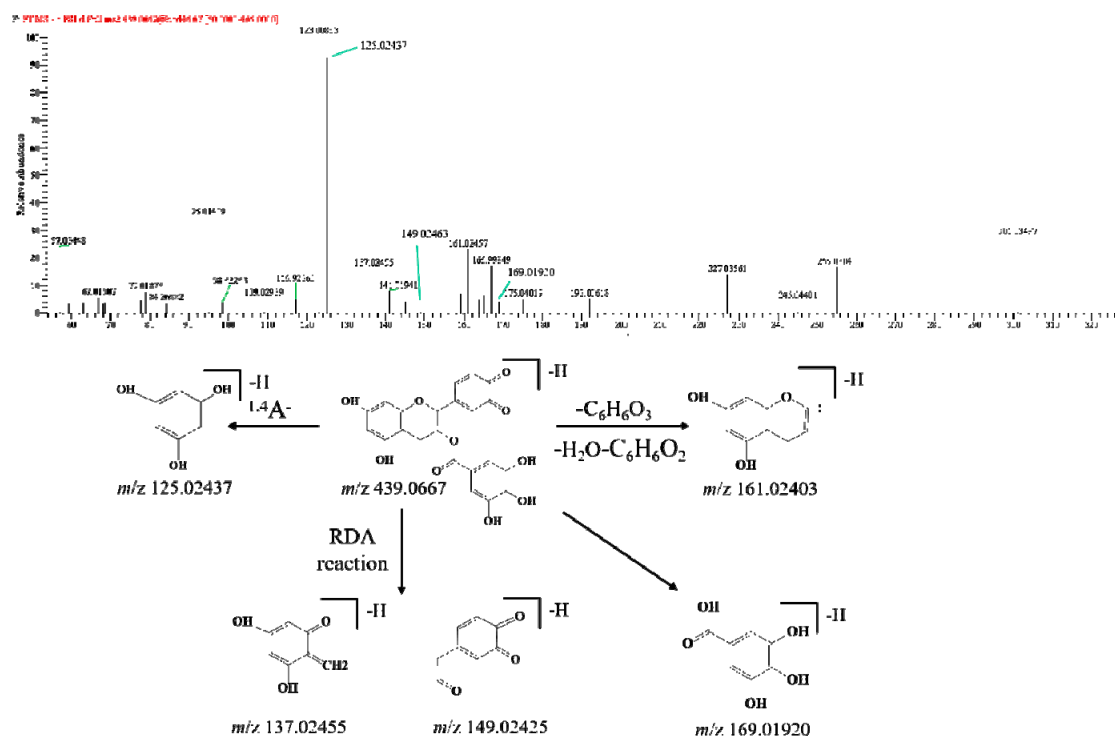

Figure S8.

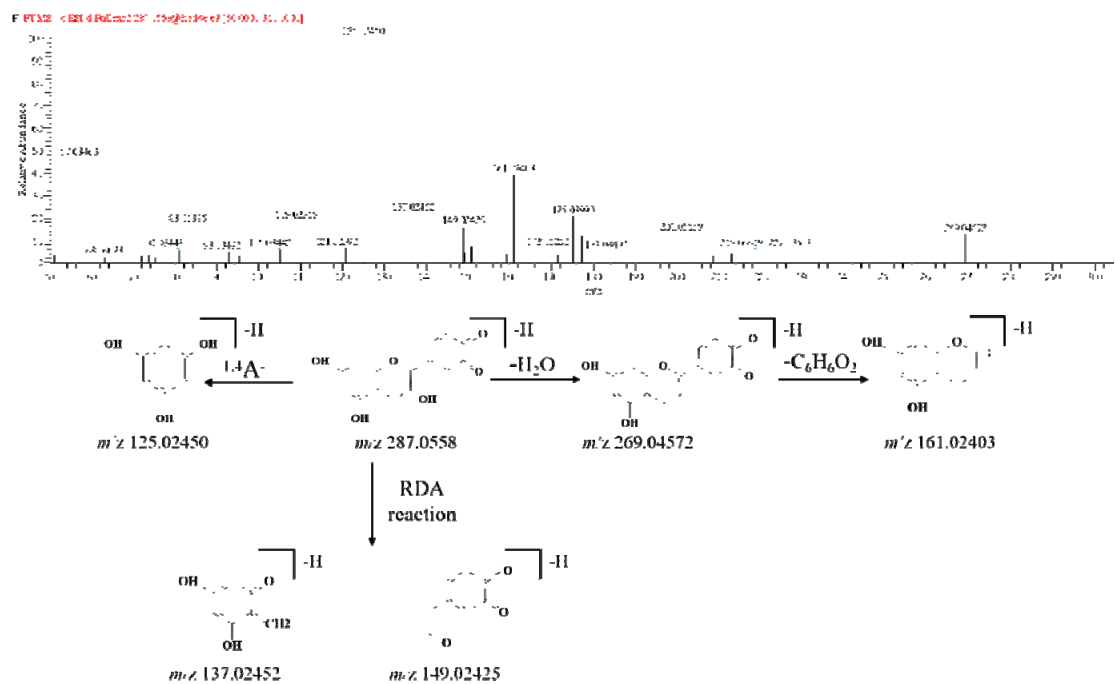

Figure S9.

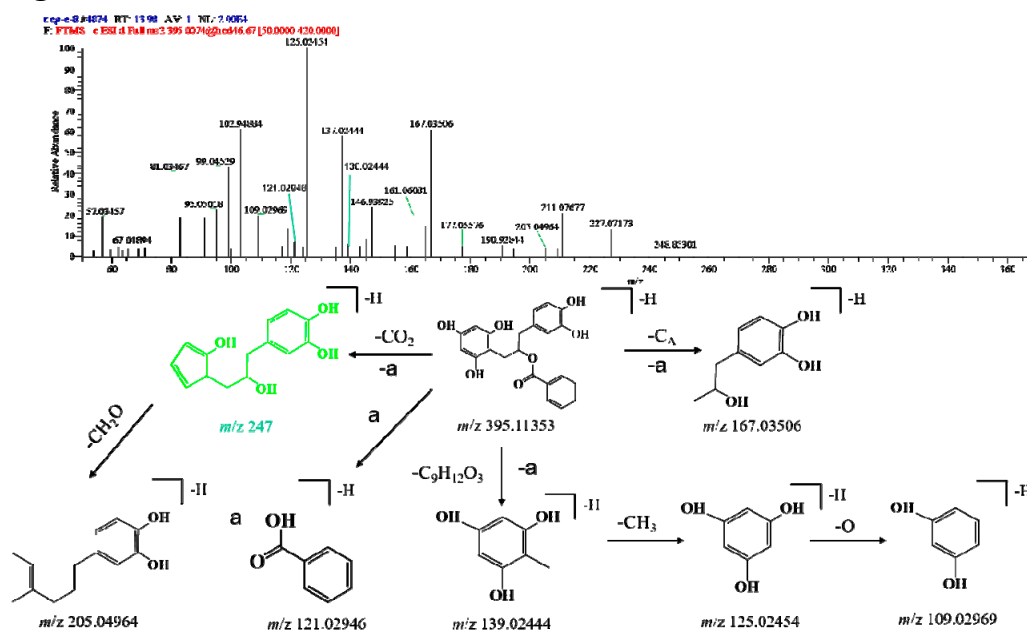

Figure S10.

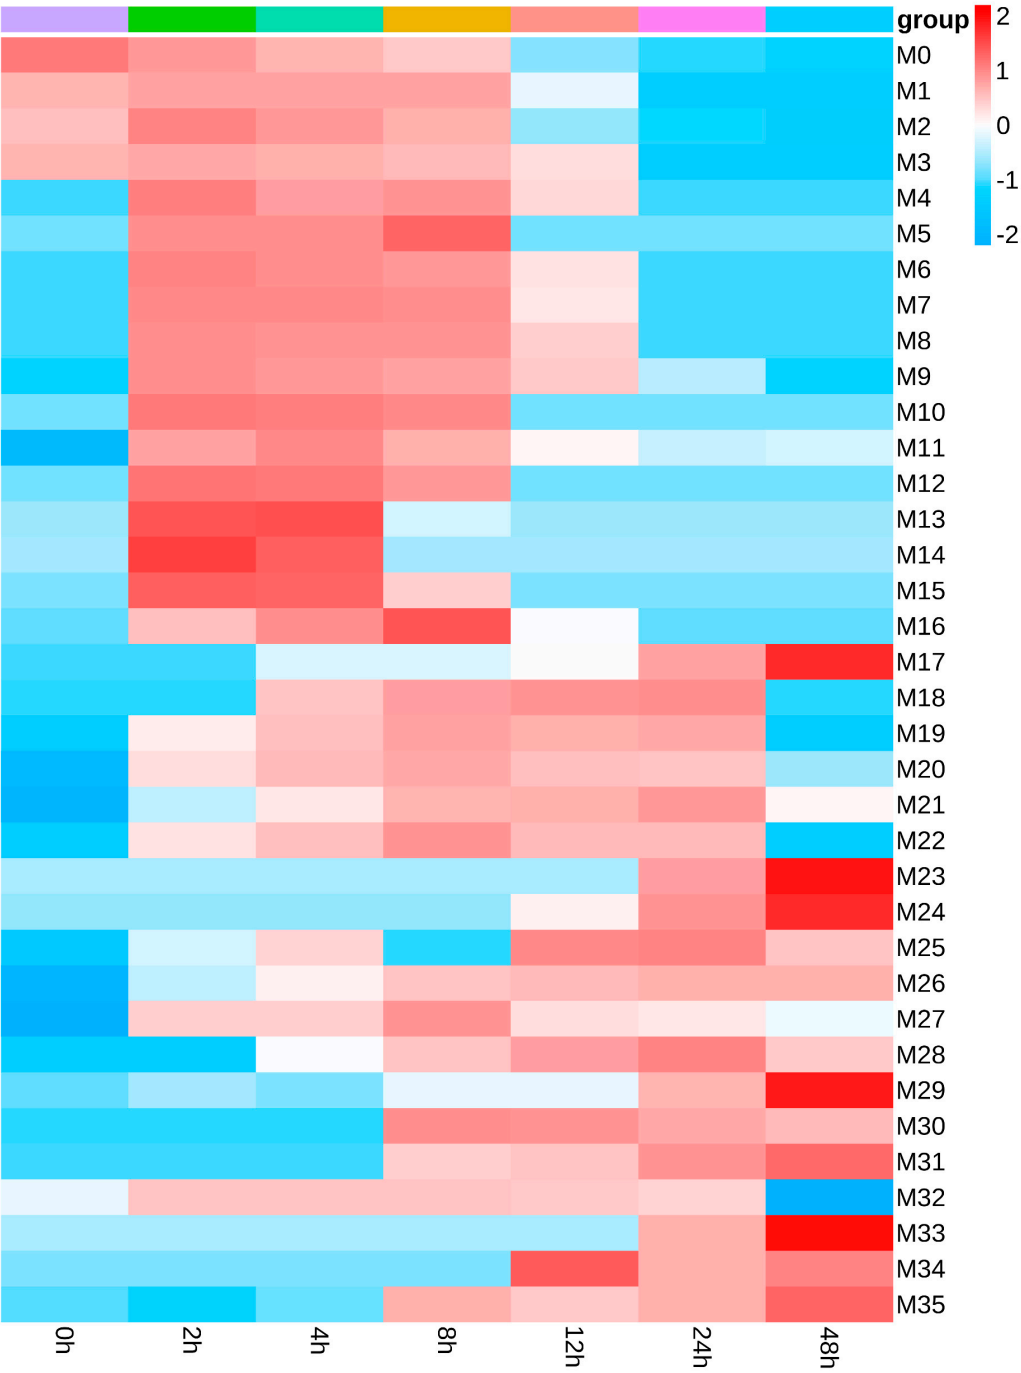



Table S1 The peak areas of metabolites detected in fermentation broth at different fermentation times at 0, 2, 4, 8, 12, 24, 48 h, respectively.

| Name | 0h       | 2h       | 4h       | 8h       | 12h      | 24h      | 48h      |
|------|----------|----------|----------|----------|----------|----------|----------|
| M0   | 8.63E+07 | 3.43E+07 | 1.89E+07 | 1.07E+07 | 2.22E+05 | 7.28E+04 | 3.63E+04 |
| M1   | 2.06E+07 | 5.25E+07 | 5.35E+07 | 4.53E+07 | 1.76E+05 | -        | -        |
| M2   | 1.51E+07 | 5.31E+07 | 3.55E+07 | 2.28E+07 | 5.98E+05 | 1.85E+05 | 1.02E+05 |
| M3   | 6.46E+07 | 4.00E+07 | 3.04E+07 | 2.00E+07 | 2.88E+06 | -        | -        |
| M4   | 0.00E+00 | 3.18E+06 | 8.29E+05 | 1.40E+06 | 8.73E+04 | -        | -        |
| M5   | -        | 1.11E+06 | 1.17E+06 | 7.08E+06 | -        | -        | -        |
| M6   | -        | 2.53E+07 | 1.54E+07 | 9.38E+06 | 2.09E+05 | -        | -        |
| M7   | -        | 5.49E+07 | 5.32E+07 | 4.54E+07 | 3.01E+05 | -        | -        |
| M8   | -        | 5.07E+08 | 3.29E+08 | 3.29E+08 | 9.20E+06 | -        | -        |
| M9   | -        | 1.70E+07 | 1.20E+07 | 7.35E+06 | 1.19E+06 | 9.51E+03 | -        |
| M10  | -        | 1.43E+06 | 1.12E+06 | 6.53E+05 | -        | -        | -        |
| M11  | -        | 1.43E+06 | 3.03E+06 | 1.02E+06 | 1.08E+05 | 2.37E+04 | 3.37E+04 |
| M12  | -        | 1.01E+08 | 7.40E+07 | 1.19E+07 | -        | -        | -        |
| M13  | -        | 4.41E+05 | 5.78E+05 | 4.68E+02 | -        | -        | -        |
| M14  | -        | 1.50E+05 | 6.44E+04 | -        | -        | -        | -        |
| M15  | -        | 1.23E+05 | 9.36E+04 | 5.43E+03 | -        | -        | -        |
| M16  | -        | 6.29E+04 | 3.62E+05 | 2.51E+06 | 5.35E+03 | -        | -        |
| M17  | -        | -        | 5.08E+03 | 4.85E+03 | 1.82E+04 | 6.75E+05 | 9.95E+07 |
| M18  | -        | -        | 4.80E+05 | 2.62E+06 | 4.92E+06 | 6.27E+06 | -        |
| M19  | -        | 4.39E+05 | 3.76E+06 | 1.21E+07 | 8.43E+06 | 8.83E+06 | -        |
| M20  | -        | 5.50E+06 | 2.08E+07 | 4.25E+07 | 1.79E+07 | 1.32E+07 | 5.85E+04 |
| M21  | -        | 1.20E+05 | 1.74E+06 | 1.23E+07 | 1.64E+07 | 3.56E+07 | 9.60E+05 |
| M22  | -        | 3.53E+05 | 1.80E+06 | 9.52E+06 | 1.83E+06 | 1.93E+06 | -        |
| M23  | -        | -        | -        | -        | -        | 1.02E+06 | 1.56E+09 |
| M24  | -        | -        | -        | -        | 9.78E+03 | 8.52E+05 | 1.39E+08 |
| M25  | -        | 1.40E+04 | 1.68E+05 | 5.33E+02 | 1.83E+06 | 2.44E+06 | 2.98E+05 |
| M26  | -        | 8.84E+04 | 7.58E+05 | 3.74E+06 | 5.82E+06 | 7.87E+06 | 7.65E+06 |
| M27  | -        | 2.85E+06 | 2.68E+06 | 1.92E+07 | 1.75E+06 | 1.17E+06 | 3.38E+05 |
| M28  | -        | -        | 3.75E+04 | 3.84E+05 | 1.31E+06 | 3.89E+06 | 2.86E+05 |
| M29  | 7.40E+04 | 8.29E+04 | 7.85E+04 | 9.77E+04 | 9.84E+04 | 1.30E+05 | 2.07E+05 |
| M30  | -        | -        | -        | 3.31E+05 | 2.59E+05 | 1.42E+05 | 8.12E+04 |
| M31  | -        | -        | -        | 1.35E+04 | 1.99E+04 | 7.50E+04 | 2.25E+05 |
| M32  | 2.23E+05 | 2.89E+06 | 2.76E+06 | 3.15E+06 | 2.36E+06 | 1.91E+06 | -        |
| M33  | -        | -        | -        | -        | -        | 1.03E+04 | 1.42E+06 |
| M34  | -        | -        | -        | -        | 7.33E+04 | 8.64E+03 | 2.55E+04 |
| M35  | 3.43E+06 | 3.16E+06 | 3.57E+06 | 5.94E+06 | 5.58E+06 | 5.94E+06 | 7.31E+06 |

Table S2 The maximal concentrations of metabolites detected in fermentation broth with the time at which it was measured.

| Name | Concentrations<br>( $\mu\text{g/mL}$ ) | Fermentation<br>Times |
|------|----------------------------------------|-----------------------|
| M0   | 43.23                                  | 0h                    |
| M1   | 26.83                                  | 4h                    |
| M2   | 26.63                                  | 2h                    |
| M3   | 20.08                                  | 2h                    |
| M4   | 1.67                                   | 2h                    |
| M5   | 3.62                                   | 8h                    |
| M6   | 12.73                                  | 2h                    |
| M7   | 27.53                                  | 2h                    |
| M8   | 253.58                                 | 2h                    |
| M9   | 8.58                                   | 2h                    |
| M10  | 0.80                                   | 2h                    |
| M11  | 1.60                                   | 4h                    |
| M12  | 50.58                                  | 2h                    |
| M13  | 0.37                                   | 4h                    |
| M14  | 0.16                                   | 2h                    |
| M15  | 0.15                                   | 2h                    |
| M16  | 1.34                                   | 8h                    |
| M17  | 49.83                                  | 48h                   |
| M18  | 3.22                                   | 24h                   |
| M19  | 6.13                                   | 8h                    |
| M20  | 21.33                                  | 8h                    |
| M21  | 17.88                                  | 24h                   |
| M22  | 4.84                                   | 8h                    |
| M23  | 780.08                                 | 48h                   |
| M24  | 69.58                                  | 48h                   |
| M25  | 1.30                                   | 24h                   |
| M26  | 4.02                                   | 24h                   |
| M27  | 9.68                                   | 8h                    |
| M28  | 2.03                                   | 24h                   |
| M29  | 0.19                                   | 48h                   |
| M30  | 0.25                                   | 8h                    |
| M31  | 0.20                                   | 48h                   |
| M32  | 1.66                                   | 8h                    |
| M33  | 0.79                                   | 48h                   |
| M34  | 0.12                                   | 12h                   |
| M35  | 3.74                                   | 48h                   |

Note: The concentrations of these metabolites were calculated based on the calibration curves of EGCG ( $R^2 > 0.99$ )

Table S3 Basic information of volunteers

| NO.         | Gender | Age | BMI   |
|-------------|--------|-----|-------|
| Volunteer 1 | Male   | 21  | 20.24 |
| Volunteer 2 | Male   | 23  | 21.37 |
| Volunteer 3 | Male   | 23  | 22.64 |
| Volunteer 4 | Male   | 24  | 22.64 |
| Volunteer 5 | Female | 22  | 21.30 |
| Volunteer 6 | Female | 22  | 19.23 |
| Volunteer 7 | Female | 23  | 19.98 |
| Volunteer 8 | Female | 24  | 20.20 |
